# Supplementary material for: Tissue Depletion of Taurine Accelerates Skeletal Muscle Senescence and Leads to Early Death in Mice
Source: PubMed Central journal article supplement (PMC4167997; doi:10.1371/journal.pone.0107409), 2014-09-17
Supplement: pone.0107409.s002.pdf [file pone.0107409.s002.pdf]

Table S1 Top 50 genes increased or decreased in old TauTKO muscles than old WT muscles

| Probe Name      | Gene Symbol   | Gene Name                                                                                         | Fold change<br>(KO-AvsWT-A) |
|-----------------|---------------|---------------------------------------------------------------------------------------------------|-----------------------------|
| <i>Increase</i> |               |                                                                                                   |                             |
| A_51_P419117    | Rab15         | RAB15, member RAS oncogene family                                                                 | 18.503                      |
| A_55_P2073552   | A930003A15Rik | RIKEN cDNA A930003A15 gene                                                                        | 15.323                      |
| A_51_P146044    | Ccdc92        | coiled-coil domain containing 92                                                                  | 10.369                      |
| A_51_P393654    | Fam171b       | family with sequence similarity 171, member B                                                     | 9.527                       |
| A_51_P241319    | Cilp          | cartilage intermediate layer protein, nucleotide pyrophosphohydrolase                             | 9.016                       |
| A_51_P469951    | Srgap3        | SLIT-ROBO Rho GTPase activating protein 3                                                         | 8.390                       |
| A_55_P2039320   | Zfp365        | zinc finger protein 365                                                                           | 7.632                       |
| A_52_P21        | Ttc9          | tetratricopeptide repeat domain 9                                                                 | 7.318                       |
| A_51_P324814    | Krt18         | keratin 18                                                                                        | 7.315                       |
| A_55_P2092296   | Fbxo2         | F-box protein 2                                                                                   | 6.833                       |
| A_55_P2008437   | Cdkn2a        | cyclin-dependent kinase inhibitor 2A                                                              | 6.742                       |
| A_55_P2052290   | Psat1         | phosphoserine aminotransferase 1                                                                  | 6.717                       |
| A_55_P2044143   | Loxl4         | lysyl oxidase-like 4                                                                              | 6.629                       |
| A_52_P404942    | ORF63         | open reading frame 63                                                                             | 6.060                       |
| A_52_P184149    | Mthfd2        | methylenetetrahydrofolate dehydrogenase (NAD+ dependent), methenyltetrahydrofolate cyclohydrolase | 6.004                       |
| A_51_P215374    | Slc6a17       | solute carrier family 6 (neurotransmitter transporter), member 17                                 | 5.607                       |
| A_52_P120803    | Ankrd1        | ankyrin repeat domain 1 (cardiac muscle)                                                          | 5.496                       |
| A_55_P1969306   | Ranbp3l       | RAN binding protein 3-like                                                                        | 5.467                       |
| A_55_P1981366   | Lamc2         | laminin, gamma 2                                                                                  | 5.426                       |
| A_55_P2137941   | Fxyd2         | FXYP domain-containing ion transport regulator 2                                                  | 5.371                       |
| A_51_P261059    | Cpne2         | copine II                                                                                         | 5.296                       |
| A_51_P315682    | Igf2bp2       | insulin-like growth factor 2 mRNA binding protein 2                                               | 5.234                       |
| A_51_P131408    | Tnfrsf12a     | tumor necrosis factor receptor superfamily, member 12a                                            | 5.166                       |
| A_51_P303620    | Whrn          | whirlin                                                                                           | 5.144                       |
| A_51_P137604    | Fcna          | ficolin A                                                                                         | 5.069                       |
| A_55_P1983448   | S100a4        | S100 calcium binding protein A4                                                                   | 4.980                       |
| A_55_P1982499   | Gldn          | gliomedin                                                                                         | 4.666                       |
| A_55_P2050602   | Ncam1         | neural cell adhesion molecule 1                                                                   | 4.537                       |
| A_55_P2078695   | Fbxl13        | F-box and leucine-rich repeat protein 13                                                          | 4.344                       |
| A_52_P428735    | Lrp2bp        | Lrp2 binding protein                                                                              | 4.170                       |
| A_55_P2068459   | Hspa1a        | heat shock protein 1A                                                                             | 4.158                       |
| A_52_P316933    | Sh3bgrl2      | SH3 domain binding glutamic acid-rich protein like 2                                              | 3.963                       |
| A_52_P360330    | Mtap1b        | microtubule-associated protein 1B                                                                 | 3.867                       |
| A_55_P2059864   | Igsf1         | immunoglobulin superfamily, member 1                                                              | 3.862                       |
| A_52_P49457     | Fbxl16        | F-box and leucine-rich repeat protein 16                                                          | 3.806                       |
| A_55_P1959748   | Asns          | asparagine synthetase                                                                             | 3.780                       |
| A_55_P2129437   | Ppap2c        | phosphatidic acid phosphatase type 2C                                                             | 3.746                       |
| A_51_P457196    | Sfrp4         | secreted frizzled-related protein 4                                                               | 3.712                       |
| A_55_P1984815   | Snph          | syntaphilin                                                                                       | 3.639                       |

|               |               |                                                                                                |        |
|---------------|---------------|------------------------------------------------------------------------------------------------|--------|
| A_55_P2121886 | Map3k9        | mitogen-activated protein kinase kinase kinase 9                                               | 3.566  |
| A_52_P452689  | Atf3          | activating transcription factor 3                                                              | 3.415  |
| A_55_P2006008 | Serp1b1a      | serine (or cysteine) peptidase inhibitor, clade B, member 1a                                   | 3.357  |
| A_51_P340747  | Hspa11        | heat shock protein 1-like                                                                      | 3.299  |
| A_55_P2069818 | Mapk10        | mitogen-activated protein kinase 10                                                            | 3.266  |
| A_51_P196844  | Osbpl3        | oxysterol binding protein-like 3                                                               | 3.233  |
| A_55_P2010116 | Rab27b        | RAB27b, member RAS oncogene family                                                             | 3.221  |
| A_55_P2425938 | 2810468N07Rik | RIKEN cDNA 2810468N07 gene                                                                     | 3.217  |
| A_51_P214127  | Cpa3          | carboxypeptidase A3, mast cell                                                                 | 3.200  |
| A_55_P2079619 | Rnf43         | ring finger protein 43                                                                         | 3.178  |
| A_55_P1985850 | Timp1         | tissue inhibitor of metalloproteinase 1                                                        | 3.159  |
| Decrease      |               |                                                                                                |        |
| A_55_P1954231 | Lrtm2         | leucine-rich repeats and transmembrane domains 2                                               | -6.884 |
| A_51_P286748  | Frzb          | frizzled-related protein                                                                       | -6.153 |
| A_51_P375969  | Ces1d         | carboxylesterase 1D                                                                            | -5.711 |
| A_55_P1999532 | Col9a1        | collagen, type IX, alpha 1                                                                     | -5.186 |
| A_52_P257625  | Esm1          | endothelial cell-specific molecule 1                                                           | -4.979 |
| A_51_P260850  | Cntnap2       | contactin associated protein-like 2                                                            | -4.526 |
| A_51_P191726  | Efcab6        | EF-hand calcium binding domain 6                                                               | -4.301 |
| A_55_P2044212 | Slc15a5       | solute carrier family 15, member 5                                                             | -3.797 |
| A_51_P155465  | Cuzd1         | CUB and zona pellucida-like domains 1                                                          | -3.682 |
| A_51_P171200  | Golm1         | golgi membrane protein 1                                                                       | -3.622 |
| A_55_P1956534 | Dach2         | dachshund 2 (Drosophila)                                                                       | -3.484 |
| A_66_P122699  | Cux2          | cut-like homeobox 2                                                                            | -3.477 |
| A_51_P397934  | Grin3b        | glutamate receptor, ionotropic, NMDA3B                                                         | -3.440 |
| A_55_P2020461 | Hmgn2         | high mobility group nucleosomal binding domain 2                                               | -3.193 |
| A_55_P2094896 | Phyhd1        | phytanoyl-CoA dioxygenase domain containing 1                                                  | -3.192 |
| A_52_P144818  | Ppp1r1a       | protein phosphatase 1, regulatory (inhibitor) subunit 1A                                       | -3.182 |
| A_55_P2058165 | Morn4         | MORN repeat containing 4                                                                       | -3.182 |
| A_55_P2136121 | 9030617O03Rik | RIKEN cDNA 9030617O03 gene                                                                     | -3.157 |
| A_52_P354744  | Slc2a3        | solute carrier family 2 (facilitated glucose transporter), member 3                            | -3.148 |
| A_55_P2008891 | Tmsb15b1      | thymosin beta 15b1                                                                             | -3.120 |
| A_55_P2257670 | A030001D16Rik | RIKEN cDNA A030001D16 gene                                                                     | -3.057 |
| A_51_P369784  | Ces1e         | carboxylesterase 1E                                                                            | -3.018 |
| A_55_P2021146 | Mchr1         | melanin-concentrating hormone receptor 1                                                       | -3.014 |
| A_55_P2360356 | 4933401D09Rik | RIKEN cDNA 4933401D09 gene                                                                     | -2.928 |
| A_55_P2044710 | Asb10         | ankyrin repeat and SOCS box-containing 10                                                      | -2.889 |
| A_55_P2416494 | 8430426J06Rik | RIKEN cDNA 8430426J06 gene                                                                     | -2.865 |
| A_66_P117933  | I830012O16Rik | RIKEN cDNA I830012O16 gene                                                                     | -2.860 |
| A_55_P2005833 | Adamts8       | a disintegrin-like and metalloproteinase (reprolysin type) with thrombospondin type 1 motif, 8 | -2.763 |
| A_52_P266686  | Ntsr2         | neurotensin receptor 2                                                                         | -2.746 |
| A_52_P263518  | Gng2          | guanine nucleotide binding protein (G protein), gamma 2                                        | -2.723 |
| A_55_P2084177 | Klhl34        | kelch-like 34 (Drosophila)                                                                     | -2.694 |
| A_51_P401987  | Tmem37        | transmembrane protein 37                                                                       | -2.640 |

|               |               |                                                                                           |        |
|---------------|---------------|-------------------------------------------------------------------------------------------|--------|
| A_55_P2172892 | 1700080G18Rik | RIKEN cDNA 1700080G18 gene                                                                | -2.636 |
| A_55_P2057076 | Magix         | MAGI family member, X-linked                                                              | -2.630 |
| A_55_P2008889 | Tmsb15b2      | thymosin beta 15b2                                                                        | -2.612 |
| A_52_P368306  | Tmem100       | transmembrane protein 100                                                                 | -2.507 |
| A_51_P309854  | Kcnn2         | potassium intermediate/small conductance calcium-activated channel, subfamily N, member 2 | -2.490 |
| A_66_P105350  | Cacna2d4      | calcium channel, voltage-dependent, alpha 2/delta subunit 4                               | -2.486 |
| A_51_P289679  | Npm2          | nucleophosmin/nucleoplasmin 2                                                             | -2.466 |
| A_51_P326685  | Lrtm1         | leucine-rich repeats and transmembrane domains 1                                          | -2.446 |
| A_51_P223404  | Plin3         | perilipin 3                                                                               | -2.445 |
| A_51_P109144  | Grtp1         | GH regulated TBC protein 1                                                                | -2.443 |
| A_51_P317191  | Eepd1         | endonuclease/exonuclease/phosphatase family domain containing 1                           | -2.428 |
| A_51_P275496  | BC026762      | cDNA sequence BC026762                                                                    | -2.427 |
| A_55_P2044547 | 2810416G20Rik | RIKEN cDNA 2810416G20 gene                                                                | -2.397 |
| A_55_P2182716 | Adig          | adipogenin                                                                                | -2.353 |
| A_55_P1987805 | Rps6ka5       | ribosomal protein S6 kinase, polypeptide 5                                                | -2.329 |
| A_52_P589568  | Foxo6         | forkhead box O6                                                                           | -2.318 |
| A_55_P1962084 | Hist2h2aa1    | histone cluster 2, H2aa1                                                                  | -2.299 |
| A_55_P2107045 | Myl4          | myosin, light polypeptide 4                                                               | -2.287 |
