# Supplementary material for: Tissue Depletion of Taurine Accelerates Skeletal Muscle Senescence and Leads to Early Death in Mice
Source: PubMed Central journal article supplement (PMC4167997; doi:10.1371/journal.pone.0107409), 2014-09-17
Supplement: pone.0107409.s003.pdf [file pone.0107409.s003.pdf]

Table S2 Top 50 genes increased or decreased in young TauTKO muscles than young WT muscles

| Probe Name      | Gene Symbol | Gene Name                                                             | Fold change<br>(KO-AvsWT-A) |
|-----------------|-------------|-----------------------------------------------------------------------|-----------------------------|
| <i>Increase</i> |             |                                                                       |                             |
| A_51_P419117    | Rab15       | RAB15, member RAS oncogene family                                     | 5.831                       |
| A_55_P2005549   | Tnn         | tenascin N                                                            | 5.457                       |
| A_51_P250337    | Igfn1       | immunoglobulin-like and fibronectin type III domain containing 1      | 4.225                       |
| A_55_P2037608   | Acp5        | acid phosphatase 5, tartrate resistant                                | 4.179                       |
| A_51_P131408    | Tnfrsf12a   | tumor necrosis factor receptor superfamily, member 12a                | 3.574                       |
| A_51_P133684    | Csrp3       | cysteine and glycine-rich protein 3                                   | 3.381                       |
| A_55_P2160296   | Olfm1       | olfactomedin 1                                                        | 3.326                       |
| A_55_P1984815   | Snph        | syntrophin                                                            | 3.321                       |
| A_51_P423549    | Shbg        | sex hormone binding globulin                                          | 3.250                       |
| A_52_P356093    | B3galt2     | UDP-Gal:betaGlcNAc beta 1,3-galactosyltransferase, polypeptide 2      | 3.049                       |
| A_51_P469951    | Srgap3      | SLIT-ROBO Rho GTPase activating protein 3                             | 3.032                       |
| A_55_P1954086   | Postn       | periostin, osteoblast specific factor                                 | 2.902                       |
| A_55_P1981366   | Lamc2       | laminin, gamma 2                                                      | 2.872                       |
| A_55_P2092296   | Fbxo2       | F-box protein 2                                                       | 2.833                       |
| A_51_P430973    | Paqr7       | progesterone and adipoQ receptor family member VII                    | 2.785                       |
| A_55_P1961270   | Cd72        | CD72 antigen                                                          | 2.696                       |
| A_55_P2009604   | Gm608       | predicted gene 608                                                    | 2.685                       |
| A_55_P1970105   | Ltbp2       | latent transforming growth factor beta binding protein 2              | 2.672                       |
| A_55_P2137941   | Fxyd2       | FXDY domain-containing ion transport regulator 2                      | 2.646                       |
| A_52_P453785    | Cthrc1      | collagen triple helix repeat containing 1                             | 2.569                       |
| A_51_P241319    | Cilp        | cartilage intermediate layer protein, nucleotide pyrophosphohydrolase | 2.524                       |
| A_51_P303620    | Whrn        | whirlin                                                               | 2.505                       |
| A_55_P2026728   | Mylk4       | myosin light chain kinase family, member 4                            | 2.469                       |
| A_55_P1973447   | Ybx2        | Y box protein 2                                                       | 2.458                       |
| A_55_P2136906   | Vpreb3      | pre-B lymphocyte gene 3                                               | 2.427                       |
| A_55_P1969306   | Ranbp3l     | RAN binding protein 3-like                                            | 2.412                       |
| A_51_P457196    | Sfrp4       | secreted frizzled-related protein 4                                   | 2.362                       |
| A_51_P205215    | Klhl30      | kelch-like 30 (Drosophila)                                            | 2.352                       |
| A_55_P2040951   | Actc1       | actin, alpha, cardiac muscle 1                                        | 2.324                       |
| A_55_P2062469   | Col12a1     | collagen, type XII, alpha 1                                           | 2.298                       |
| A_52_P167535    | BC060267    | cDNA sequence BC060267                                                | 2.298                       |
| A_51_P419017    | Pde10a      | phosphodiesterase 10A                                                 | 2.290                       |
| A_51_P196844    | Osbpl3      | oxysterol binding protein-like 3                                      | 2.280                       |
| A_51_P173709    | Gprc5b      | G protein-coupled receptor, family C, group 5, member B               | 2.276                       |
| A_55_P2069935   | Fxyd2       | FXDY domain-containing ion transport regulator 2                      | 2.275                       |
| A_55_P2146111   | Spink11     | serine peptidase inhibitor, Kazal type 11                             | 2.273                       |
| A_55_P1979330   | Dapp1       | dual adaptor for phosphotyrosine and 3-phosphoinositides 1            | 2.257                       |
| A_52_P141338    | Acot10      | acyl-CoA thioesterase 10                                              | 2.247                       |
| A_55_P2036083   | Gm5797      | predicted gene 5797                                                   | 2.236                       |

|                 |               |                                                              |         |
|-----------------|---------------|--------------------------------------------------------------|---------|
| A_51_P227392    | Rhou          | ras homolog gene family, member U                            | 2.207   |
| A_55_P1961335   | Ctsk          | cathepsin K                                                  | 2.175   |
| A_55_P2124751   | Col16a1       | collagen, type XVI, alpha 1                                  | 2.170   |
| A_51_P392291    | Pdk3          | pyruvate dehydrogenase kinase, isoenzyme 3                   | 2.157   |
| A_55_P1962937   | Trem2         | triggering receptor expressed on myeloid cells 2             | 2.156   |
| A_51_P244824    | Dapp1         | dual adaptor for phosphotyrosine and 3-phosphoinositides 1   | 2.152   |
| A_52_P659312    | Spsb4         | splA/ryanodine receptor domain and SOCS box containing 4     | 2.151   |
| A_52_P390944    | Chst3         | carbohydrate (chondroitin 6/keratan) sulfotransferase 3      | 2.140   |
| A_51_P458384    | Slc38a2       | solute carrier family 38, member 2                           | 2.138   |
| A_55_P2006008   | Serpinb1a     | serine (or cysteine) peptidase inhibitor, clade B, member 1a | 2.136   |
| A_55_P1983773   | Birc5         | baculoviral IAP repeat-containing 5                          | 2.126   |
| <i>Decrease</i> |               |                                                              |         |
| A_55_P2152547   | Myl3          | myosin, light polypeptide 3                                  | -13.405 |
| A_51_P257951    | Retnla        | resistin like alpha                                          | -5.654  |
| A_55_P1973683   | Morn4         | MORN repeat containing 4                                     | -4.040  |
| A_55_P2094896   | Phyhd1        | phytanoyl-CoA dioxygenase domain containing 1                | -3.939  |
| A_51_P286748    | Frzb          | frizzled-related protein                                     | -3.442  |
| A_55_P2044212   | Slc15a5       | solute carrier family 15, member 5                           | -3.192  |
| A_52_P18765     | Hsbp111       | heat shock factor binding protein 1-like 1                   | -3.051  |
| A_52_P175376    | Tcfcp2l1      | transcription factor CP2-like 1                              | -2.973  |
| A_55_P2020461   | Hmgn2         | high mobility group nucleosomal binding domain 2             | -2.873  |
| A_55_P2044710   | Asb10         | ankyrin repeat and SOCS box-containing 10                    | -2.737  |
| A_51_P375969    | Ces1d         | carboxylesterase 1D                                          | -2.631  |
| A_55_P2416494   | 8430426J06Rik | RIKEN cDNA 8430426J06 gene                                   | -2.536  |
| A_66_P123980    | 2310015K22Rik | RIKEN cDNA 2310015K22 gene                                   | -2.528  |
| A_55_P2257670   | A030001D16Rik | RIKEN cDNA A030001D16 gene                                   | -2.507  |
| A_55_P1954231   | Lrtm2         | leucine-rich repeats and transmembrane domains 2             | -2.440  |
| A_51_P191726    | Efcab6        | EF-hand calcium binding domain 6                             | -2.438  |
| A_66_P105350    | Cacna2d4      | calcium channel, voltage-dependent, alpha 2/delta subunit 4  | -2.390  |
| A_55_P2175880   | Mgst1         | microsomal glutathione S-transferase 1                       | -2.389  |
| A_55_P2070045   | Golga7b       | golgi autoantigen, golgin subfamily a, 7B                    | -2.373  |
| A_55_P1999532   | Col9a1        | collagen, type IX, alpha 1                                   | -2.295  |
| A_51_P260850    | Cntnap2       | contactin associated protein-like 2                          | -2.278  |
| A_51_P171200    | Golm1         | golgi membrane protein 1                                     | -2.252  |
| A_52_P496403    | 1700001O22Rik | RIKEN cDNA 1700001O22 gene                                   | -2.226  |
| A_55_P2031999   | 9030617O03Rik | RIKEN cDNA 9030617O03 gene                                   | -2.217  |
| A_51_P401987    | Tmem37        | transmembrane protein 37                                     | -2.205  |
| A_51_P109369    | Fbxo32        | F-box protein 32                                             | -2.109  |
| A_55_P2122605   | Cbr2          | carbonyl reductase 2                                         | -2.100  |
| A_51_P223404    | Plin3         | perilipin 3                                                  | -2.078  |
| A_55_P1961014   | Selenbp1      | selenium binding protein 1                                   | -2.063  |
| A_55_P2018061   | Cd209a        | CD209a antigen                                               | -2.056  |
| A_51_P109144    | Grtp1         | GH regulated TBC protein 1                                   | -2.035  |
| A_55_P2177488   | Hist2h2be     | histone cluster 2, H2be                                      | -2.023  |
| A_55_P2178510   | Mc3r          | melanocortin 3 receptor                                      | -1.984  |
| A_52_P311853    | Ddit4l        | DNA-damage-inducible transcript 4-like                       | -1.974  |

|               |               |                                                                                |        |
|---------------|---------------|--------------------------------------------------------------------------------|--------|
| A_51_P369784  | Ces1e         | carboxylesterase 1E                                                            | -1.963 |
| A_51_P112734  | Slc7a8        | solute carrier family 7 (cationic amino acid transporter, y+ system), member 8 | -1.952 |
| A_52_P521882  | Hddc3         | HD domain containing 3                                                         | -1.950 |
| A_66_P122699  | Cux2          | cut-like homeobox 2                                                            | -1.949 |
| A_55_P2172892 | 1700080G18Rik | RIKEN cDNA 1700080G18 gene                                                     | -1.942 |
| A_51_P115953  | Ctxn3         | cortexin 3                                                                     | -1.926 |
| A_52_P257625  | Esm1          | endothelial cell-specific molecule 1                                           | -1.925 |
| A_51_P179697  | Fam57b        | family with sequence similarity 57, member B                                   | -1.887 |
| A_52_P281702  | Igfbp5        | insulin-like growth factor binding protein 5                                   | -1.874 |
| A_52_P615375  | Hist3h2a      | histone cluster 3, H2a                                                         | -1.872 |
| A_55_P2107155 | Rasd2         | RASD family, member 2                                                          | -1.865 |
| A_51_P215438  | Prodh         | proline dehydrogenase                                                          | -1.858 |
| A_51_P112817  | Cyp27a1       | cytochrome P450, family 27, subfamily a, polypeptide 1                         | -1.853 |
| A_52_P126266  | Prkab2        | protein kinase, AMP-activated, beta 2 non-catalytic subunit                    | -1.844 |
| A_55_P2057070 | Magix         | MAGI family member, X-linked                                                   | -1.837 |
| A_55_P2002572 | Ephx2         | epoxide hydrolase 2, cytoplasmic                                               | -1.836 |
