# Supplementary material for: Tissue Depletion of Taurine Accelerates Skeletal Muscle Senescence and Leads to Early Death in Mice
Source: PubMed Central journal article supplement (PMC4167997; doi:10.1371/journal.pone.0107409), 2014-09-17
Supplement: pone.0107409.s004.pdf [file pone.0107409.s004.pdf]

Table S3 Biological function identified by IPA of increased or decreased genes of old TauTKO muscle.

| Category                   | Diseases or Functions<br>Annotation               | p-Value  | Activation<br>z-score | Molecules                                                                                                                                         |
|----------------------------|---------------------------------------------------|----------|-----------------------|---------------------------------------------------------------------------------------------------------------------------------------------------|
| Cell Cycle                 | arrest in G1 phase of<br>breast cancer cell lines | 1.12E-04 |                       | CDKN2A, GDF15, LGALS3                                                                                                                             |
|                            | cell cycle progression                            | 1.56E-03 | 1.853                 | ASNS, CDKN2A, CXCL10, E2F2,<br>KRT18, LGALS3, MSLN, NPM2,<br>RRAD, SPDYA, TP63, ZNF365                                                            |
|                            | mitosis                                           | 8.14E-03 | 0.747                 | CDKN2A, CXCL10, E2F2, KRT18,<br>NPM2, ZNF365                                                                                                      |
| Lipid<br>Metabolism        | release of prostaglandin<br>D2                    | 2.51E-04 |                       | LPIN1, PLA2G5                                                                                                                                     |
| Cellular<br>Compromise     | degranulation of cells                            | 7.84E-04 | 1.4                   | C4A/C4B, CX3CL1, LPIN1, NCAM1,<br>TRIB3                                                                                                           |
| Cellular<br>Movement       | chemotaxis of microglia                           | 1.07E-03 |                       | CX3CL1, CXCL10                                                                                                                                    |
|                            | cell movement of<br>granulocytes                  | 1.04E-02 | 2.219                 | C4A/C4B, CX3CL1, CXCL10, LGALS3,<br>PLA2G5                                                                                                        |
| Cell Death<br>and Survival | necrosis                                          | 3.55E-03 | 1.178                 | APLN, ASNS, ATP2A2, C8orf4,<br>CDKN2A, CX3CL1, CXCL10, E2F2,<br>GDF15, KRT18, LGALS3, MAP3K9,<br>NCAM1, PKP2, PLA2G5, RRAD, TP63,<br>TRIB3, UCHL1 |
|                            | apoptosis                                         | 5.32E-03 | 0.98                  | APLN, ASNS, C8orf4, CDKN2A,<br>CX3CL1, CXCL10, E2F2, GDF15,<br>KRT18, LGALS3, MAP3K9, NCAM1,<br>PKP2, PLA2G5, RRAD, SPINT2, TP63,<br>TRIB3, UCHL1 |
