# Supplementary material for: Tissue Depletion of Taurine Accelerates Skeletal Muscle Senescence and Leads to Early Death in Mice
Source: PubMed Central journal article supplement (PMC4167997; doi:10.1371/journal.pone.0107409), 2014-09-17
Supplement: pone.0107409.s005.pdf [file pone.0107409.s005.pdf]

Table S4 Biological function identified by IPA in overlap genes which are significantly changed in both young and old TauTKO muscle.

| Category                          | Diseases or Functions Annotation     | p-Value  | z-score | Molecules                                                              |
|-----------------------------------|--------------------------------------|----------|---------|------------------------------------------------------------------------|
| Amino Acid Metabolism             | uptake of neutral amino acid         | 4.67E-05 |         | EDN1, SLC38A2, SLC6A9                                                  |
|                                   | quantity of L-aspartic acid          | 1.49E-02 |         | PRODH                                                                  |
| Cellular Growth and Proliferation | formation of connective tissue cells | 4.40E-03 | 0.152   | BIRC5, FRZB, SFRP2, SFRP4                                              |
|                                   | colony formation of cells            | 8.47E-03 | 1.097   | ANKRD1, BIRC5, EDN1, GADD45G, HSPA1A/HSPA1B, LOXL4, RUNX1, SFRP2, TP63 |
| Protein Synthesis                 | expression of protein                | 3.39E-03 | 1.134   | APLP1, HSPA1A/HSPA1B, IGF2BP2, IGHM, SRCIN1, TP63, YBX2                |
| Lipid Metabolism                  | synthesis of dinoprost               | 3.47E-03 |         | EDN1, IGHM                                                             |
|                                   | quantity of steroid                  | 1.02E-02 | 1.116   | CES1D, CYP27A1, EPHX2, MCHR1, SHBG, SRGAP3, TIMP1, TNFRSF12A, WNT4     |
| Protein Folding                   | refolding of protein                 | 4.08E-03 |         | DNAJA4, HSPA1A/HSPA1B                                                  |
