# Supplementary material for: Tissue Depletion of Taurine Accelerates Skeletal Muscle Senescence and Leads to Early Death in Mice
Source: PubMed Central journal article supplement (PMC4167997; doi:10.1371/journal.pone.0107409), 2014-09-17
Supplement: pone.0107409.s006.pdf [file pone.0107409.s006.pdf]

Table S5

| gene     | Forward primer              | Reverse primer              |
|----------|-----------------------------|-----------------------------|
| p16INK4a | 5'-CCCAACGCCCCGAACT-3'      | 5'-GCAGAAGAGCTGCTACGTGAA-3' |
| XBP1-s   | 5'-GAGTCCGCAGCAGGTC-3'      | 5'-GTGTCAGAGTCCATGGGA-3'    |
| XBP1-u   | 5'-ACATCTTCCCATGGACTCTG -3' | 5'-TAGGTCCTTCTGGGTAGACC -3' |
